# Supplementary material for: An Efficient Augmented Lagrangian Method for Statistical X-Ray CT Image Reconstruction
Source: PubMed Central journal article supplement (PMC4619856; doi:10.1371/journal.pone.0140579), 2015-10-23
Supplement: pone.0140579.s001.pdf [file pone.0140579.s001.pdf]

## Appendix 1: Adaptive Nonmonotone Line Search

The adaptive nonmonotone line search for smooth function was proposed by Dai and Fletcher in [20]. In this method, as described in detail previously [21],  $\psi_r$  is a reference function value, and it must be improved at each iteration such that

$$\psi(x_k + \alpha d_k) \leq \psi_r + \alpha \delta \nabla \psi(x_k)^T d_k \quad (1)$$

where  $d_k$  is a descent direction, and  $\delta \in (0, 1)$  is a given constant and  $\alpha > 0$  is the tried stepsize. As described in detail previously [28], the sequence of  $\alpha$  should decrease in this line search procedure, starting with  $\alpha = 1$ , until the test condition (1) is satisfied. As described in detail previously [28],  $\psi_{best}$  denotes the current least value of the objective function over all past iterates, that is,  $\psi_{best} = \min_{1 \leq i \leq k} \psi(x_i)$  at the  $k$ -th iteration. As described in detail previously [28],  $l$  denotes the number of iterations since the value of  $\psi_{best}$  was obtained. As described in detail previously [28], the candidate function  $\psi_c$  denotes the maximum value of the objective function since the value of  $\psi_{best}$  was found.

The updating strategy for the reference function value  $f_r$  is described in detail previously [28]. Suppose that  $K$  is a preset positive integer. To allow  $\psi(x_k) \geq \psi(x_0)$  on early iterations, we can set  $\psi_r = +\infty$  initially as described in detail previously [28]. If there is a better function value in  $K$  iterations, then the value of  $\psi_r$  remains unchanged. Otherwise, if  $l = K$ , we reset the reference function value  $\psi_r$  to  $\psi_c$  and reset  $\psi_c$  to the current value  $\psi(x_k)$  as described in detail previously [28]. A more precise statement is presented in the ANAD algorithm.
