# Supplementary material for: An Efficient Augmented Lagrangian Method for Statistical X-Ray CT Image Reconstruction
Source: PubMed Central journal article supplement (PMC4619856; doi:10.1371/journal.pone.0140579), 2015-10-23
Supplement: pone.0140579.s002.pdf [file pone.0140579.s002.pdf]

## Appendix 2: Convergence Analysis of ALM-ANAD Algorithm

The convergence of ALM has been thoroughly studied [22,23], so the convergence of the present ALM-ANAD algorithm relies on the convergence of ANAD algorithm. By extending Dai and Fletcher's proof [20], we establish the convergence results of ANAD algorithm.

Firstly, we impose the following assumptions on the function  $\phi(x, y)$ .

**Assumption 1** There exists  $L > 0$ , such that at any given  $y$ , and for all  $x$  and  $\tilde{x}$ ,

$$\|\nabla_1\phi(x, y) - \nabla_1\phi(\tilde{x}, y)\|_2 \leq L\|x - \tilde{x}\|_2. \quad (1)$$

**Assumption 2** The function  $\phi(x, y)$  is bounded below, i.e., there exists  $C > 0$  such that for all  $(x, y)$ ,

$$\phi(x, y) \geq -C. \quad (2)$$

The convergence result of ANAD algorithm relies on the following lemma. For notational simplicity, let us define  $\phi_k(\cdot) = \phi(\cdot, y_k)$  and  $\nabla\phi_k(\cdot) = \nabla_1\phi(\cdot, y_k)$ .

**Lemma 1** Let  $\alpha_k$  satisfies condition (??) in ANAD algorithm, for all  $k > 0$ , we have

$$\alpha_k \geq \min \left\{ 1, \frac{2(1-\delta)\theta_1}{L} \frac{|\nabla\phi_k(x_k)^T d_k|}{\|d_k\|^2} \right\} \quad (3)$$

**Proof.** In fact, if  $\alpha = 1$  satisfies condition (??), then we have  $\alpha_k = 1$ . Otherwise, there exists  $\rho \in [\theta_1, \theta_2]$  for which  $\frac{\alpha_k}{\rho} > 0$  fails to satisfy condition (??), it follows that

$$\phi_k(x_k + \frac{\alpha_k}{\rho}d_k) > \phi_k + \delta\frac{\alpha_k}{\rho}\nabla\phi_k(x_k)^T d_k. \quad (4)$$

On the other hand, by the mean-value theorem and Lipschitz condition, we have

$$\begin{aligned} \phi_k(x_k + \frac{\alpha_k}{\rho}d_k) - \phi_k(x_k) &= \int_0^{\frac{\alpha_k}{\rho}} \langle \nabla\phi_k(x_k + td_k) - \nabla\phi_k(x_k), d_k \rangle dt + \frac{\alpha_k}{\rho}\nabla\phi_k(x_k)^T d_k \\ &\leq \frac{L}{2} \left( \frac{\alpha_k}{\rho} \right)^2 \|d_k\|^2 + \frac{\alpha_k}{\rho}\nabla\phi_k(x_k)^T d_k. \end{aligned} \quad (5)$$

Combing the above two inequalities, we can find that (3) holds.

Then, the convergence theorem result of the ANAD algorithm can be described as follows.

**Theorem 1** Let  $\{(x_k, y_k)\}$  be a sequence generated by the ANAD algorithm. Then any accumulation point of the sequence  $\{(x_k, y_k)\}$  is a stationary point, that is,

$$\begin{cases} \liminf_{k \rightarrow \infty} \|\nabla_1\phi(x_k, y_k)\|_2 = 0, \\ \nabla_2\phi(x_k, y_k) \ni 0. \end{cases} \quad (6)$$

**Proof.** We need to establish the two relationships given in equation (6). As the definition  $y_k = \arg \min_y \phi(x_k, y)$  in the ANAD algorithm,  $0 \in \nabla_2\phi(x_k, y_k)$  always holds. Thus, it

suffices to show that the second equation holds in (6). By contradiction, for all  $k > 0$ , we have  $\langle \nabla \phi_k(x_k), d_k \rangle \leq -\epsilon$  for some  $\epsilon > 0$ . In this case, we can conclude that there exists an infinite subsequence  $I$  such that for  $k_i \in I$ , the values of  $\phi_r$  on iterations  $k_i$  are strictly monotonically decreasing. Let  $\phi_r^{k_i}$  denote the value  $\phi_r$  on iteration  $k_i$ , we have

$$\phi_{k_i}(x_{k_i+1}) \leq \phi_r^{k_i} + \delta \alpha_{k_i} \langle \nabla \phi_{k_i}(x_{k_i}), d_{k_i} \rangle \leq \phi_r^{k_0} + \delta \sum_{j=k_0, j \in I}^{k_i} \alpha_j \langle \nabla \phi_j(x_j), d_j \rangle \quad (7)$$

Furthermore, from the definition of  $d_k$  and Lemma 1, we have  $\langle \nabla \phi_k(x_k), d_k \rangle \leq -\frac{1}{\rho_{\max}} \|d_k\|^2$  and  $\alpha_k \geq \min \left\{ 1, \frac{2(1-\delta)\theta_1}{L\rho_{\max}} \right\}$ . So, we can derive that

$$\phi_r^{k_0} - \phi_{k_i}(x_{k_i}) \geq \delta \sum_{j=k_0, j \in I}^{k_i} \alpha_j \langle \nabla \phi_j(x_j), d_j \rangle \geq \epsilon \delta \sum_{j=k_0, j \in I}^{k_i} \min \left\{ 1, \frac{2(1-\delta)\theta_1}{L\rho_{\max}} \right\} \quad (8)$$

Since  $\phi(x, y)$  is bounded below, let  $i \rightarrow \infty$ , we get  $\infty > \phi_r^{k_0} - \phi_{k_i}(x_{k_i}) \rightarrow \infty$ . This is a contradiction. Hence,  $\liminf_{k \rightarrow \infty} \|\nabla_1 \phi(x_k, y_k)\|_2 = 0$ , which completes the proof.

Finally, as indicated before, the convergence of ALM-ANAD algorithm follows from that of ANAD algorithm.
